# Supplementary material for: Surface in situ self-reconstructing hierarchical structures derived from ferrous carbonate as efficient bifunctional iron-based catalysts for oxygen and hydrogen evolution reactions
Source: Royal Society of Chemistry journal article supplement (doi:10.1039/d0ta05623e), 2020-01-01
Supplement: d0ta05623e1.pdf [file d0ta05623e1.pdf]

## Supporting information

### **Surface in-situ self-reconstructing hierarchical structures derived from ferrous carbonate as efficient bifunctional iron-based catalysts for oxygen and hydrogen evolution reactions**

Taotao Gao,<sup>a</sup> Caixia Zhou,<sup>c</sup> Xiaojuan Chen,<sup>b</sup> Zhihan Huang,<sup>b</sup> Hongyan Yuan<sup>b</sup> and Dan Xiao<sup>a, b\*</sup>

<sup>a</sup> Institute for Advanced Study, Chengdu University, Chengdu, 610106, P. R. China

E-mail: xiaodan@scu.edu.cn

<sup>b</sup> College of Chemical Engineering, Sichuan University, 610064, P. R. China

<sup>c</sup> Institute of New Energy and Low-Carbon Technology, Sichuan University, 610064, P. R. China

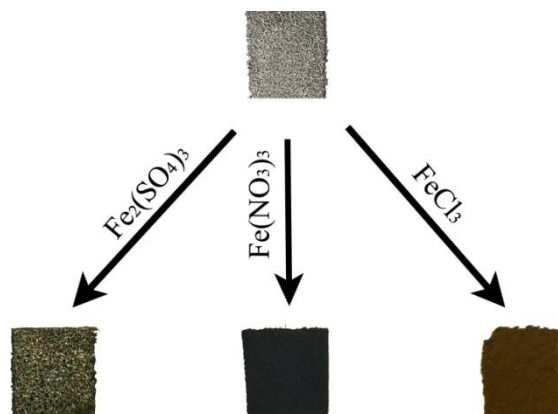

**Fig. S1** The colors of the catalytic electrodes based on different iron resources.

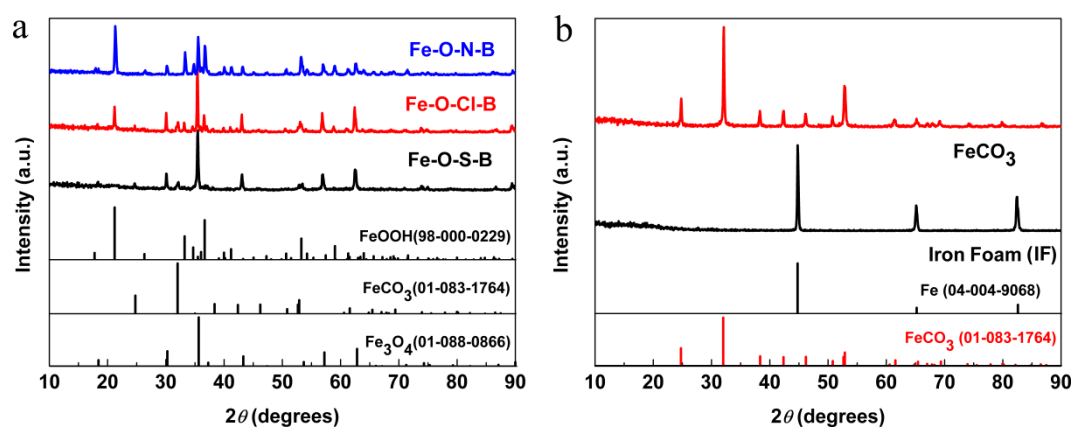

**Fig. S2** a) The XRD patterns of Fe-O-S-B, Fe-O-N-B and Fe-O-Cl-B, b) the XRD patterns of  $\text{FeCO}_3$  powder and IF.

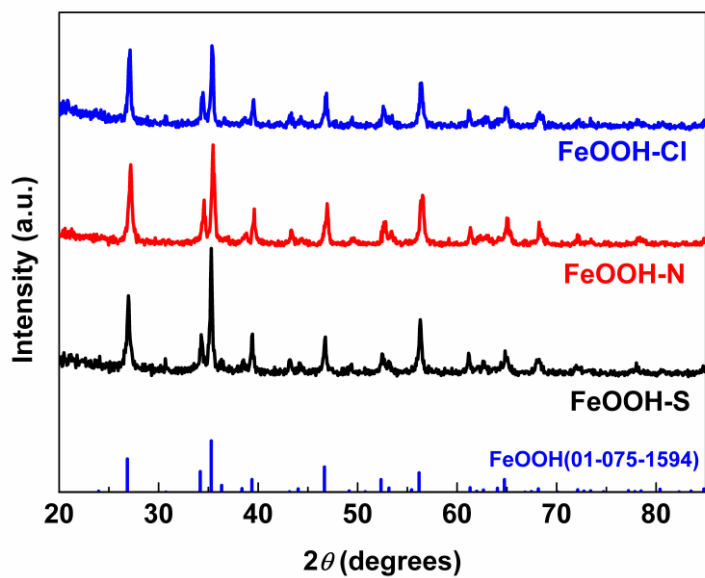

**Fig. S3** The XRD patterns of FeOOH-S, FeOOH-N and FeOOH-Cl.

**Table S1.** The pH of the solutions based on different iron resources.

| Iron resource | Fe(NO <sub>3</sub> ) <sub>3</sub> | FeCl <sub>3</sub> | Fe <sub>2</sub> (SO <sub>4</sub> ) <sub>3</sub> |
|---------------|-----------------------------------|-------------------|-------------------------------------------------|
| pH            | 2.28                              | 2.26              | 2.15                                            |

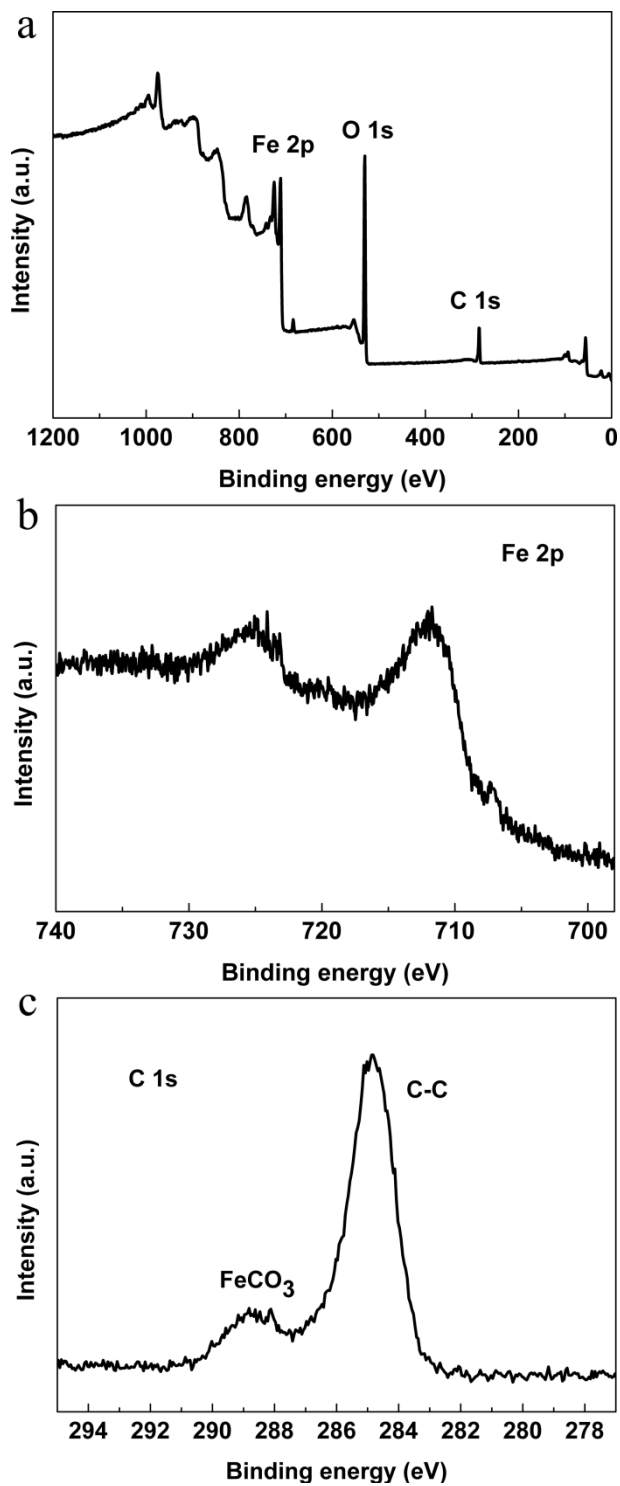

**Fig. S4** a) The full XPS spectrum, b) Fe 2p and c) C 1s XPS spectra of FeCO<sub>3</sub>@IF.

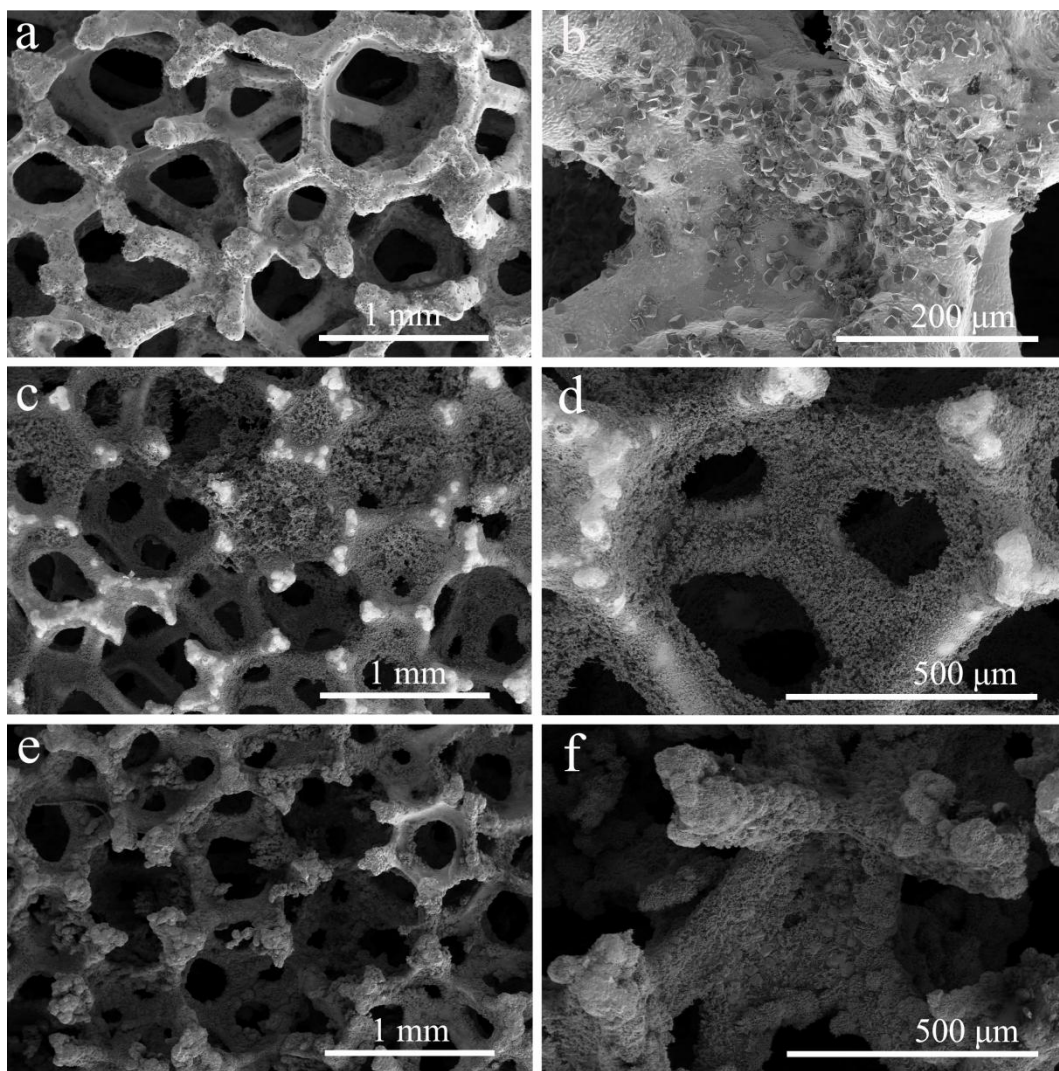

**Fig. S5** The SEM images of a, b)  $\text{FeCO}_3@IF$ , c, d)  $\text{Fe}_3\text{O}_4@IF$  and e, f)  $\text{Fe-O-M@IF}$ .

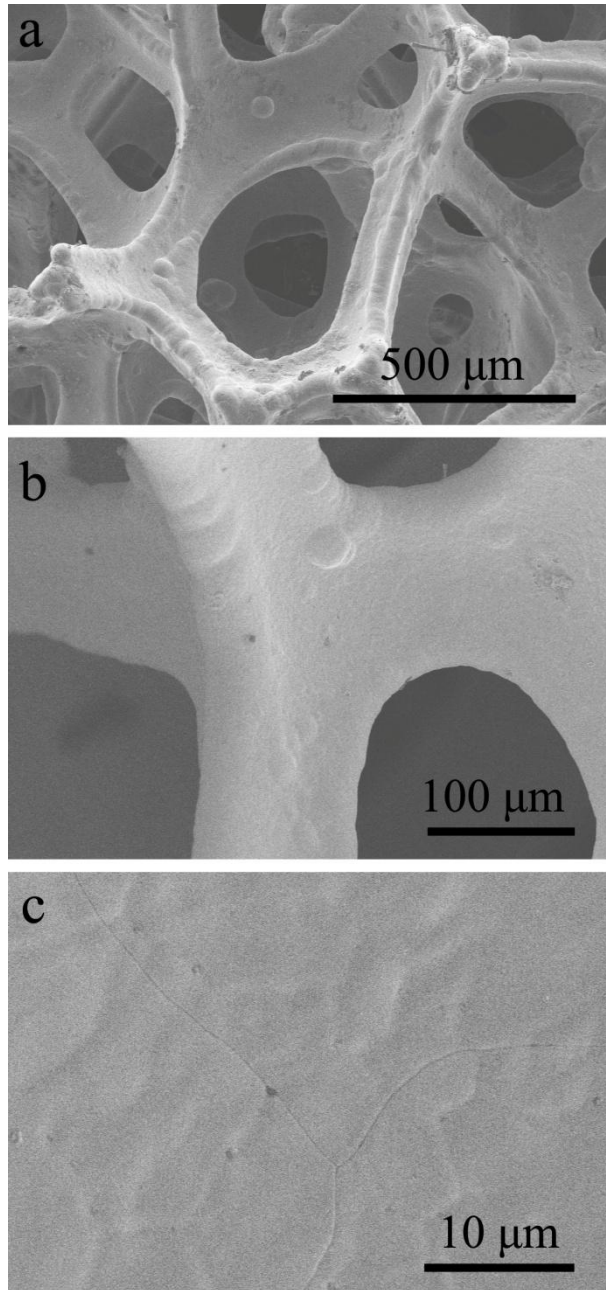

**Fig. S6** The SEM images of IF.

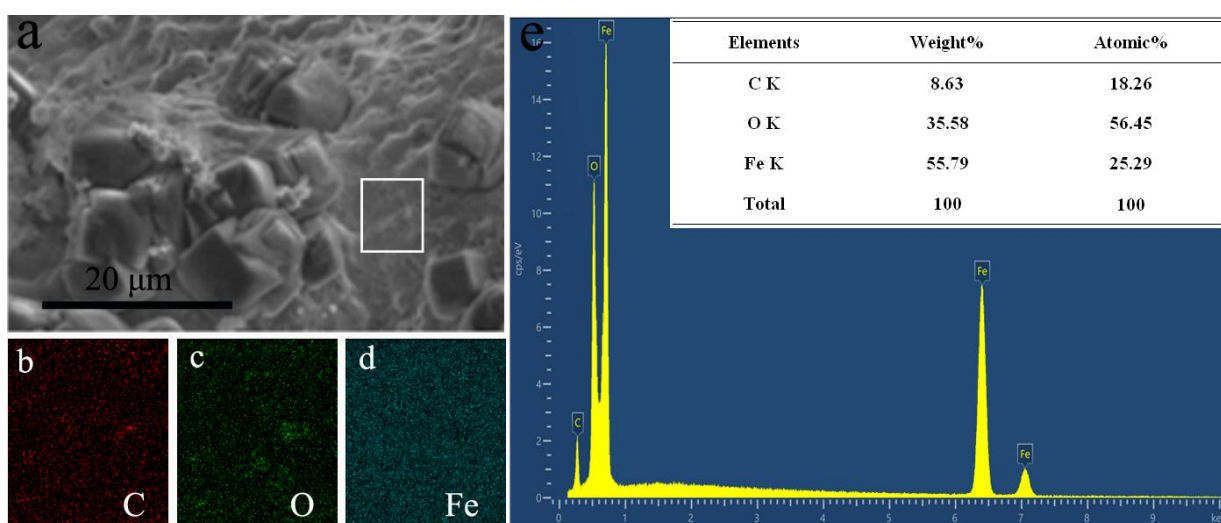

**Fig. S7** a) The SEM image of FeCO<sub>3</sub>@IF, b), c), and d) the distribution of elements (C, O and Fe, respectively), e) the corresponding EDS spectrum.

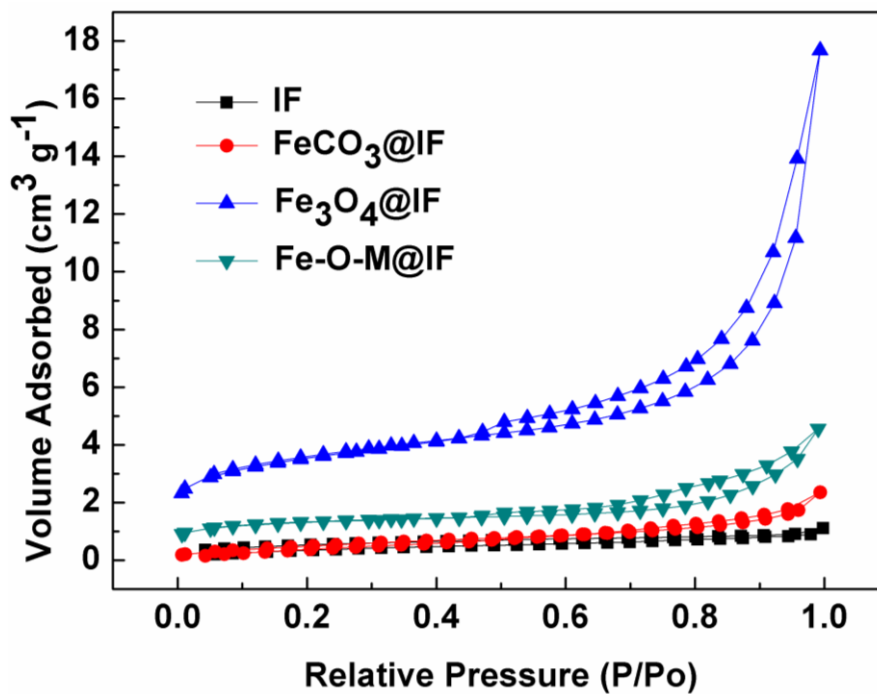

**Fig. S8** The N<sub>2</sub> adsorption-desorption isotherm of the electrodes.

**Table S2.** The specific surface area of IF, FeCO<sub>3</sub>@IF, Fe<sub>3</sub>O<sub>4</sub>@IF and Fe-O-M@IF electrodes.

| Electrode                                                  | IF    | FeCO <sub>3</sub> @IF | Fe <sub>3</sub> O <sub>4</sub> @IF | Fe-O-M@IF |
|------------------------------------------------------------|-------|-----------------------|------------------------------------|-----------|
| Specific surface area<br>(m <sup>2</sup> g <sup>-1</sup> ) | 0.673 | 1.912                 | 12.690                             | 4.661     |



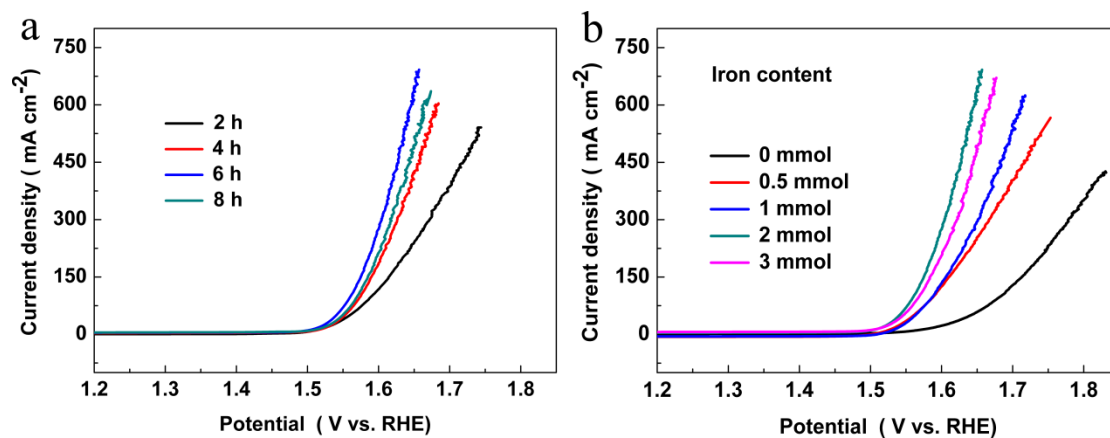

**Fig. S9** The polarization curves of the FeCO<sub>3</sub>@IF electrodes based on different a) hydrothermal reaction time and b) Fe<sup>3+</sup> content in solution (Fe<sub>2</sub>(SO<sub>4</sub>)<sub>3</sub> as iron resource).

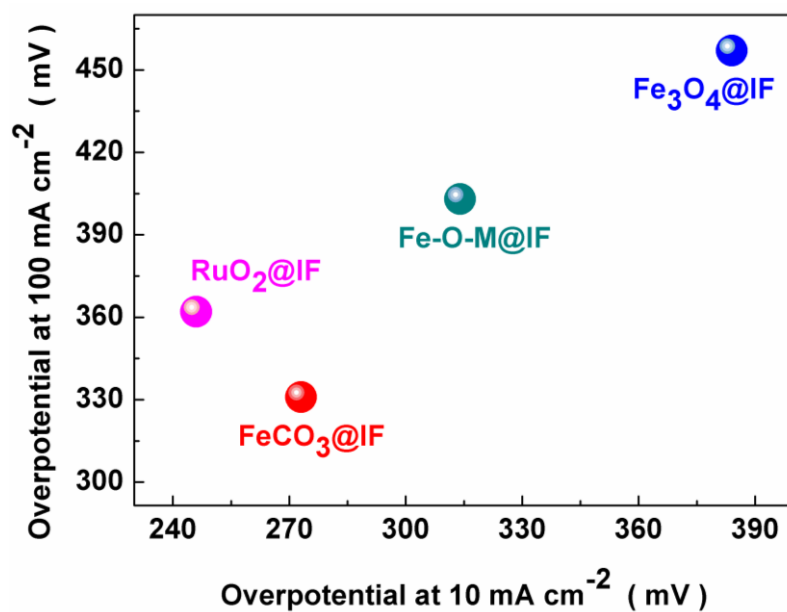

**Fig. S10** The overpotential at the current density of 10 and 100 mA cm<sup>-2</sup> of the catalysts.

**Table S3.** The comparison of OER catalytic activity in 1 M KOH

| Catalysts                                                                         | Tafel slope<br>(mV dec <sup>-1</sup> ) | Overpotential (mV)<br>@ 10 mA cm <sup>-2</sup> | References |
|-----------------------------------------------------------------------------------|----------------------------------------|------------------------------------------------|------------|
| FeO <sub>x</sub>                                                                  | 93                                     | 588                                            | [1]        |
| FeOOH nanoparticles                                                               | -                                      | ~330                                           | [2]        |
| FeOOH@NF                                                                          | 60                                     | 307                                            | [3]        |
| Fe <sub>2</sub> O <sub>3</sub> /CNT                                               | 61                                     | 370                                            | [4]        |
| CP@FeP                                                                            | 64                                     | 350                                            | [5]        |
| Fe/Fe <sub>3</sub> CF@CNT@Fe                                                      | 49                                     | 288                                            | [6]        |
| Co <sub>4</sub> N nanowire arrays                                                 | 44                                     | 257                                            | [7]        |
| Np-(Co <sub>0.52</sub> Fe <sub>0.48</sub> ) <sub>2</sub> P                        | 30                                     | 270                                            | [8]        |
| NiCo LDH                                                                          | 40                                     | 367                                            | [9]        |
| NiFe-LDH                                                                          | 47                                     | 350                                            | [10]       |
| Ni <sub>30</sub> Fe <sub>7</sub> Co <sub>20</sub> Ce <sub>43</sub> O <sub>x</sub> | 70                                     | 410                                            | [11]       |
| Co-Fe-O@MWCNT                                                                     | 51                                     | 368                                            | [12]       |
| Ni/Ni <sub>3</sub> N                                                              | 60                                     | ~322                                           | [13]       |
| NiFeP                                                                             | 87                                     | 280                                            | [14]       |
| FeCO <sub>3</sub> @IF                                                             | 59                                     | 273                                            | This work  |
| Fe <sub>3</sub> O <sub>4</sub> @IF                                                | 71                                     | 384                                            | This work  |
| Fe-O-M@IF                                                                         | 73                                     | 314                                            | This work  |

**Table S4.** The comparison of OER catalytic activity of the RuO<sub>2</sub> materials in 1 M KOH

| Catalytic electrodes             | Tafel slope<br>(mV dec <sup>-1</sup> ) | Overpotential (mV)      |                          | References |
|----------------------------------|----------------------------------------|-------------------------|--------------------------|------------|
|                                  |                                        | @10 mA cm <sup>-2</sup> | /100 mA cm <sup>-2</sup> |            |
| RuO <sub>2</sub> @ Iron foam     | 87                                     | 246/362                 |                          | This work  |
| RuO <sub>2</sub> @ Iron foam     | 47                                     | ~310/-                  |                          | [15]       |
| RuO <sub>2</sub> @ Iron foam     | 72                                     | ~270/~350               |                          | [16]       |
| RuO <sub>2</sub> @ Ni foam       | 88                                     | ~240/~350               |                          | [17]       |
| RuO <sub>2</sub> @ Ni foam       | 66                                     | ~300/~380               |                          | [18]       |
| RuO <sub>2</sub> @ Ni foam       | 99                                     | ~270/~390               |                          | [19]       |
| RuO <sub>2</sub> @ Ni foam       | 58                                     | 242/~480                |                          | [20]       |
| RuO <sub>2</sub> @ Carbon cloth  | 66                                     | ~270/~350               |                          | [21]       |
| RuO <sub>2</sub> @ Carbon cloth  | 69                                     | 295/~390                |                          | [22]       |
| RuO <sub>2</sub> @ Carbon cloth  | 103                                    | ~210/~340               |                          | [23]       |
| RuO <sub>2</sub> @ Glassy carbon | 93                                     | ~340/-                  |                          | [24]       |
| RuO <sub>2</sub> @ Glassy carbon | 57                                     | ~260/-                  |                          | [25]       |
| RuO <sub>2</sub> @ Co foam       | 139                                    | ~240/~370               |                          | [26]       |

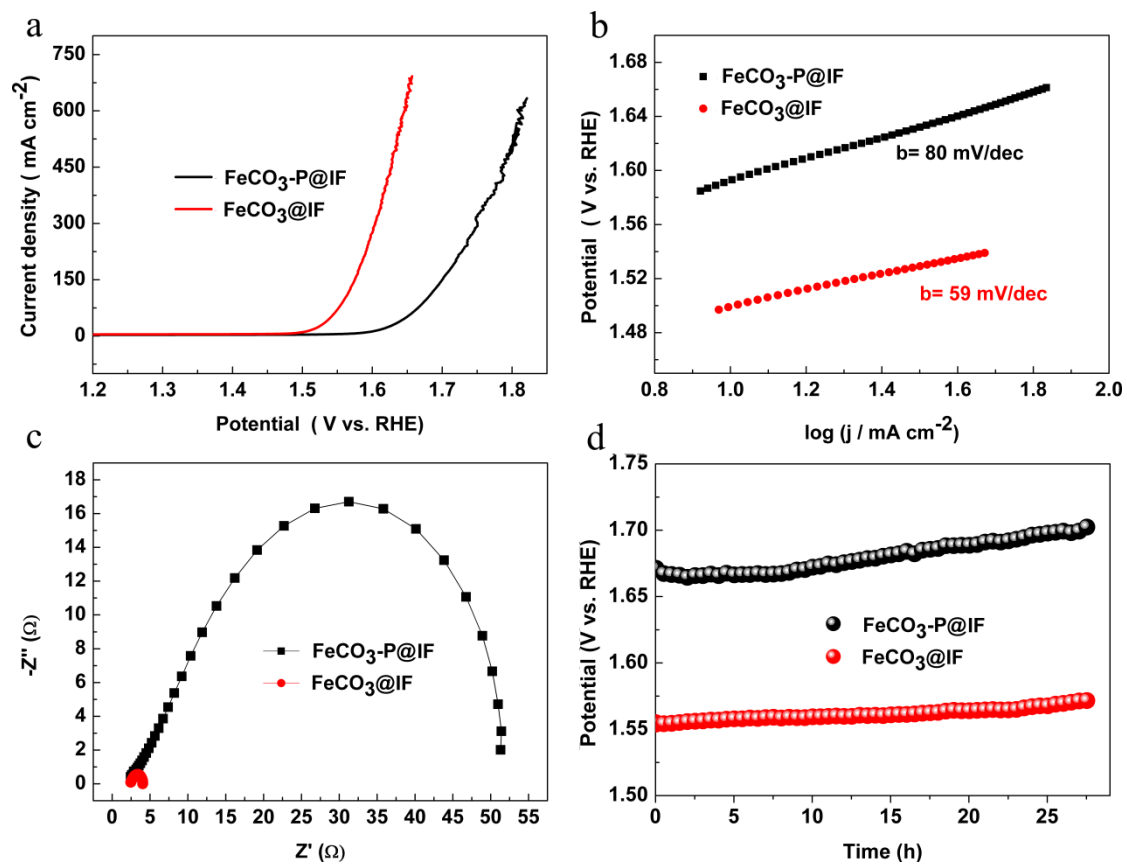

**Fig. S11** a) the polarization curves, b) the Tafel plots, c) the EIS at 1.55 V vs. RHE and d) the stability test of the catalysts at the current density of 100 mA cm<sup>-2</sup> for FeCO<sub>3</sub>-P@IF and FeCO<sub>3</sub>@IF, respectively.

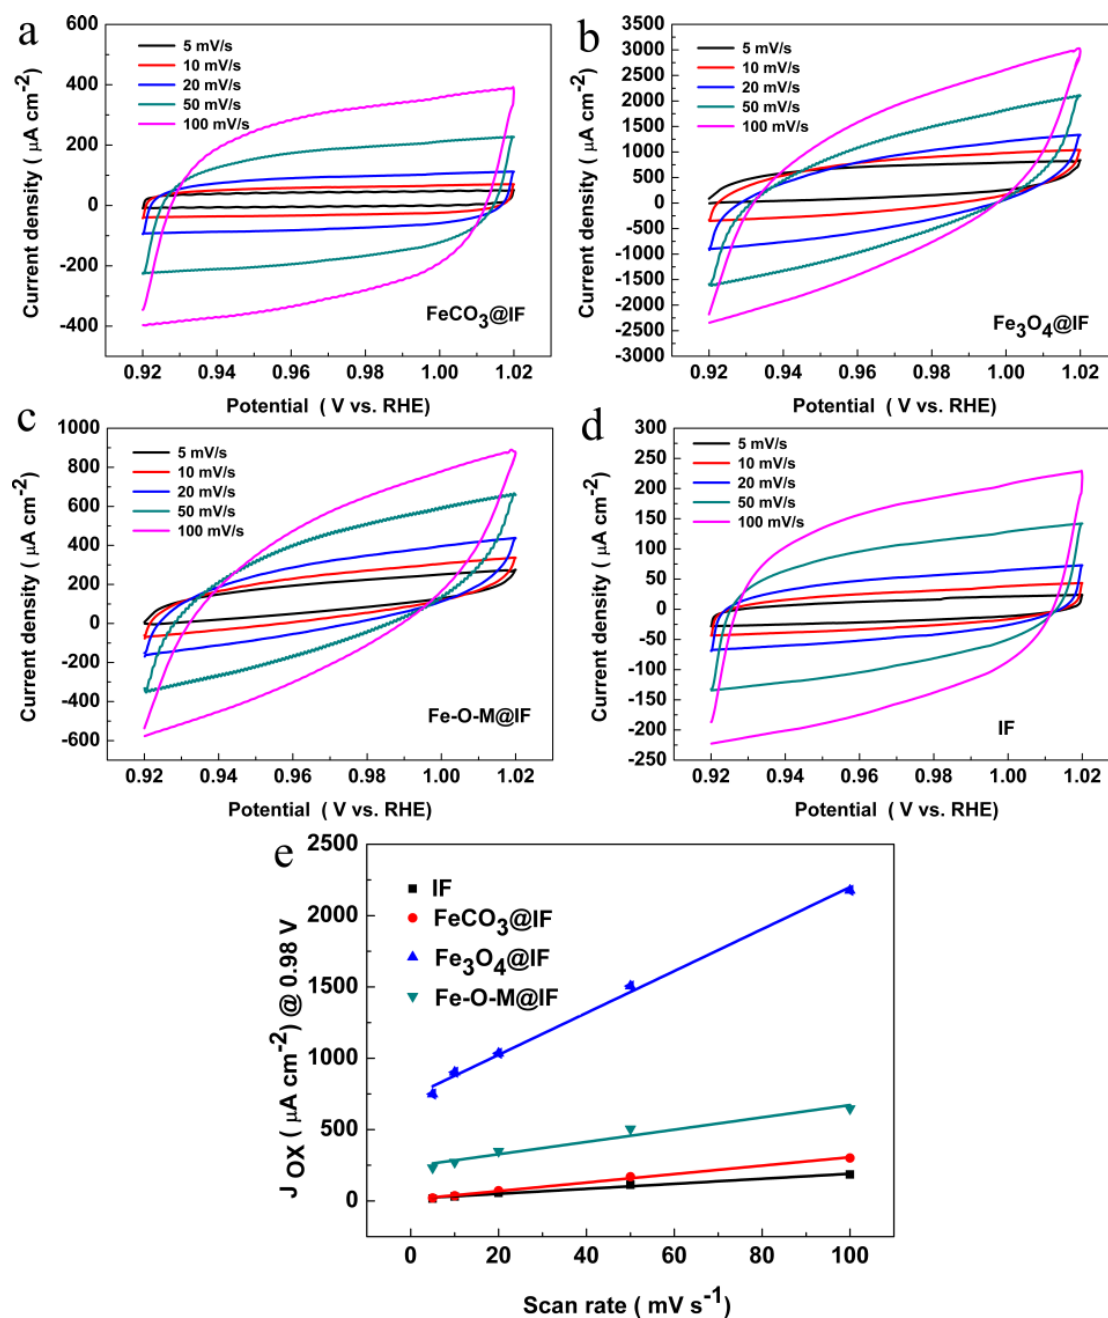

**Fig. S12** The double-layer capacitance measurements of these catalysts after OER; a-d) the cyclic voltammograms of the catalysts at a series of scan rates of 5, 10, 20, 50 and 100 mV s<sup>-1</sup> from 0.92 to 1.02 V vs. RHE in 1 M KOH; e) the linear fitting of the oxidation currents of the catalysts at 0.98 V vs. RHE versus scan rates.

Electrical double-layer capacitance measurements were used to determine electrochemical active surface area of the catalysts. According to Fig. S11e, the electrical double-layer capacitance could be obtained. Then the electrochemical active surface area could be obtained based on the specific capacitance value of a smooth standard with a real surface area of 1 cm<sup>2</sup>. 40 uF cm<sup>-2</sup> is considered as the value of specific capacitance for a smooth standard with a real surface area of 1 cm<sup>2</sup> based on previous studies.

The electrochemical active surface area could be obtained via the following equation:

$$A_{\text{ECSA}} = \frac{\text{The electrical double-layer capacitor}}{40}$$

For example:

$$\text{FeCO}_3\text{@IF: } A_{\text{ECSA}} = \frac{2956.7}{40} = 73.9 \text{ cm}^2_{\text{ECSA}}$$

**Table S5.** The calculated electrochemical active surface area (ECSA) of the obtained electrodes after OER.

| Catalysts                                   | IF     | FeCO <sub>3</sub> @IF | Fe <sub>3</sub> O <sub>4</sub> @IF | Fe-O-M@IF |
|---------------------------------------------|--------|-----------------------|------------------------------------|-----------|
| Specific Capacitance (uF cm <sup>-2</sup> ) | 1745.3 | 2956.7                | 14685.9                            | 4309.6    |
| ECSA (cm <sup>2</sup> <sub>ECSA</sub> )     | 43.6   | 73.9                  | 367.1                              | 107.7     |

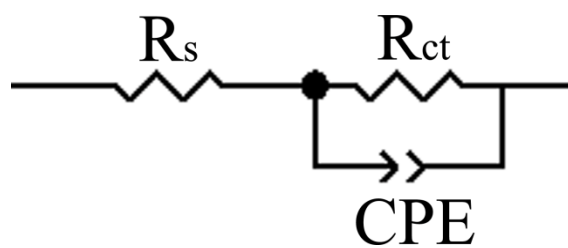

**Fig. S13** The simplified Randles equivalent circuit for the test of the electrochemical impedance spectroscopy.

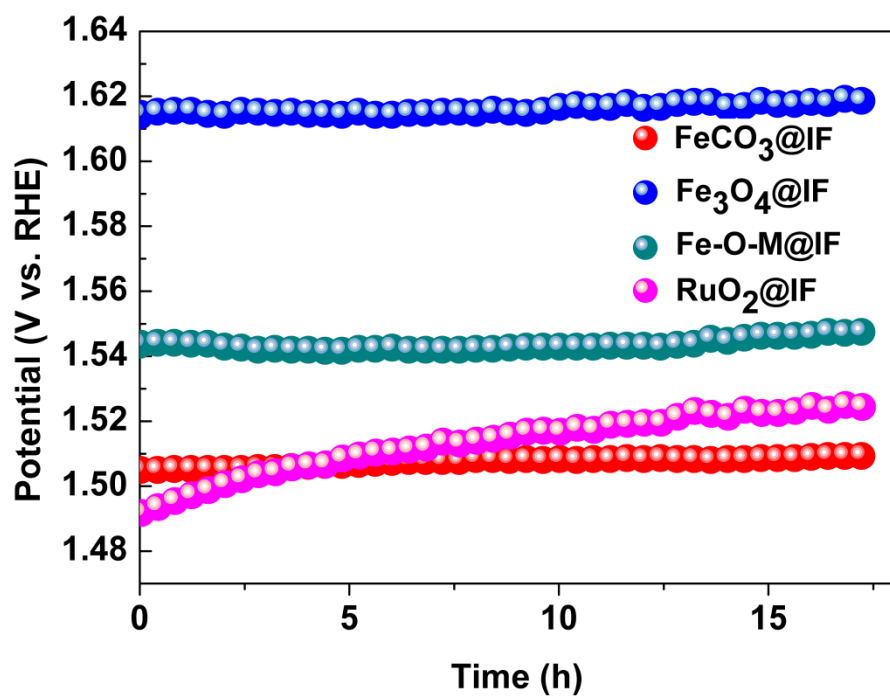

**Fig. S14** The stability tests of the catalysts at the current density of 10 mA cm<sup>-2</sup>.

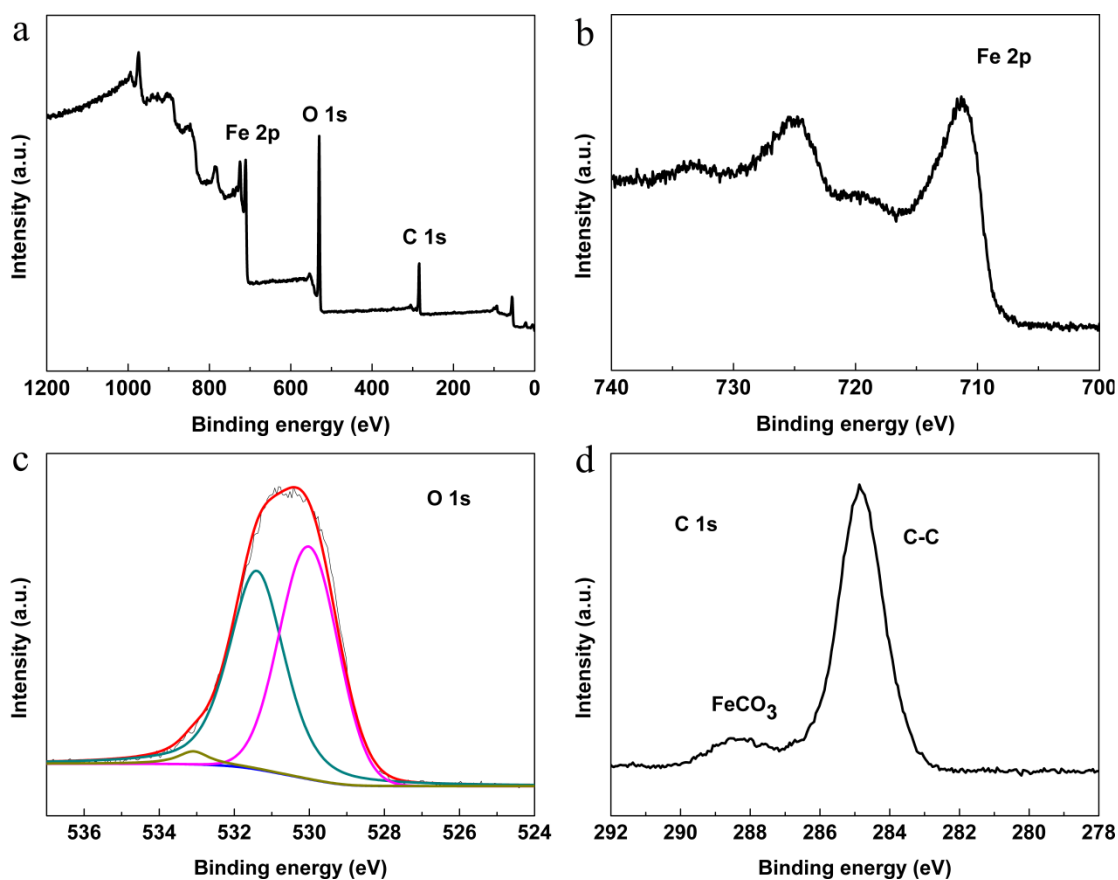

**Fig. S15** a) The full XPS spectrum, b) Fe 2p, c) O 1s and d) C 1s of FeCO<sub>3</sub>@IF after OER.

**Table S6.** According to the XPS spectra, the change of Fe content in different chemical environment for FeCO<sub>3</sub>@IF before and after OER process.

| Chemical environment | FeCO <sub>3</sub> @IF |         |         |
|----------------------|-----------------------|---------|---------|
|                      | Fe (0)                | Fe (%)  |         |
|                      |                       | Fe (2+) | Fe (3+) |
| Before OER           | 6.81                  | 33.24   | 55.95   |
| After OER            | 0                     | 27.39   | 72.61   |



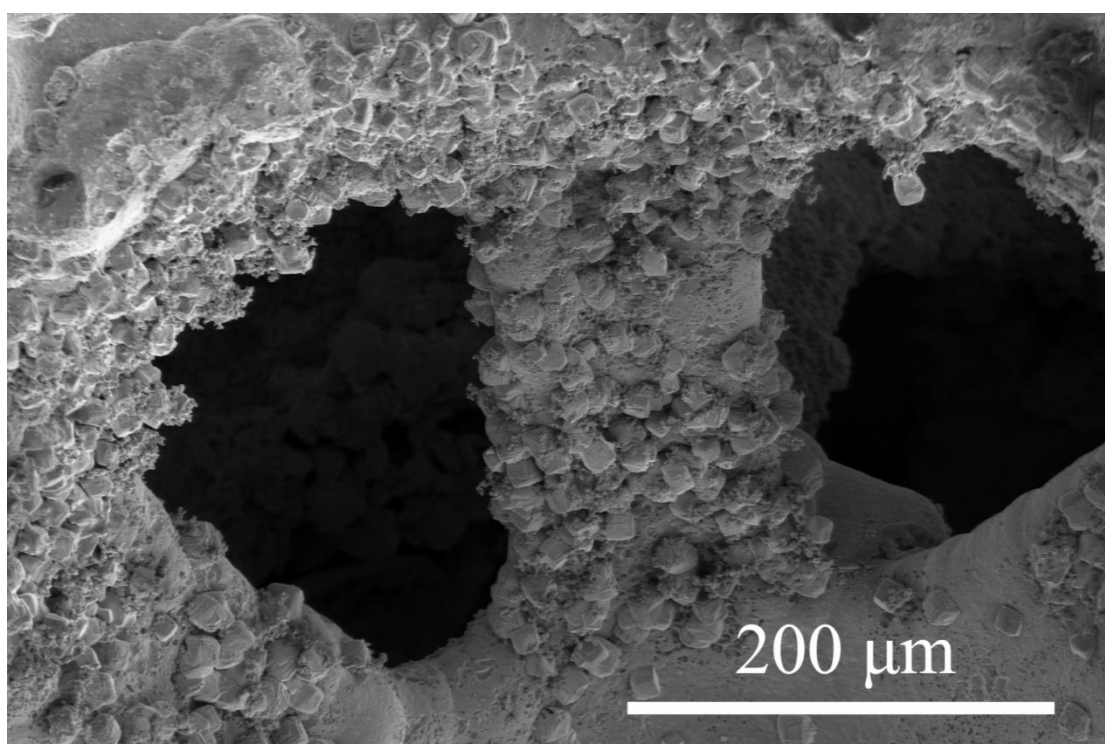

**Fig. S16** The SEM image of FeCO<sub>3</sub>@IF after OER.

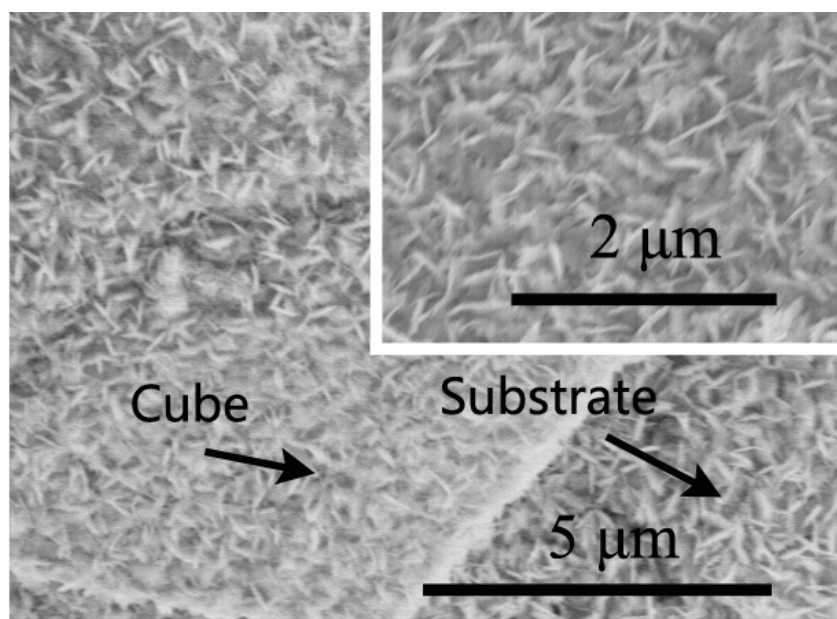

Fig. S17 The SEM image of the surface of  $\text{FeCO}_3$  cube and the area without  $\text{FeCO}_3$  cubes.

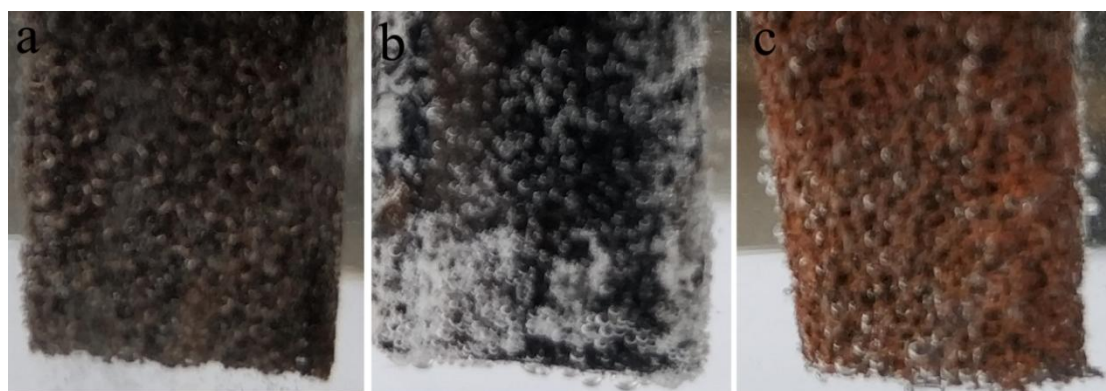

**Fig. S18** The images of bubbles on the surface a)  $\text{FeCO}_3@IF$ , b)  $\text{Fe}_3\text{O}_4@IF$  and c)  $\text{Fe-O-M@IF}$  during OER process at the current density of  $100 \text{ mA cm}^{-2}$ .

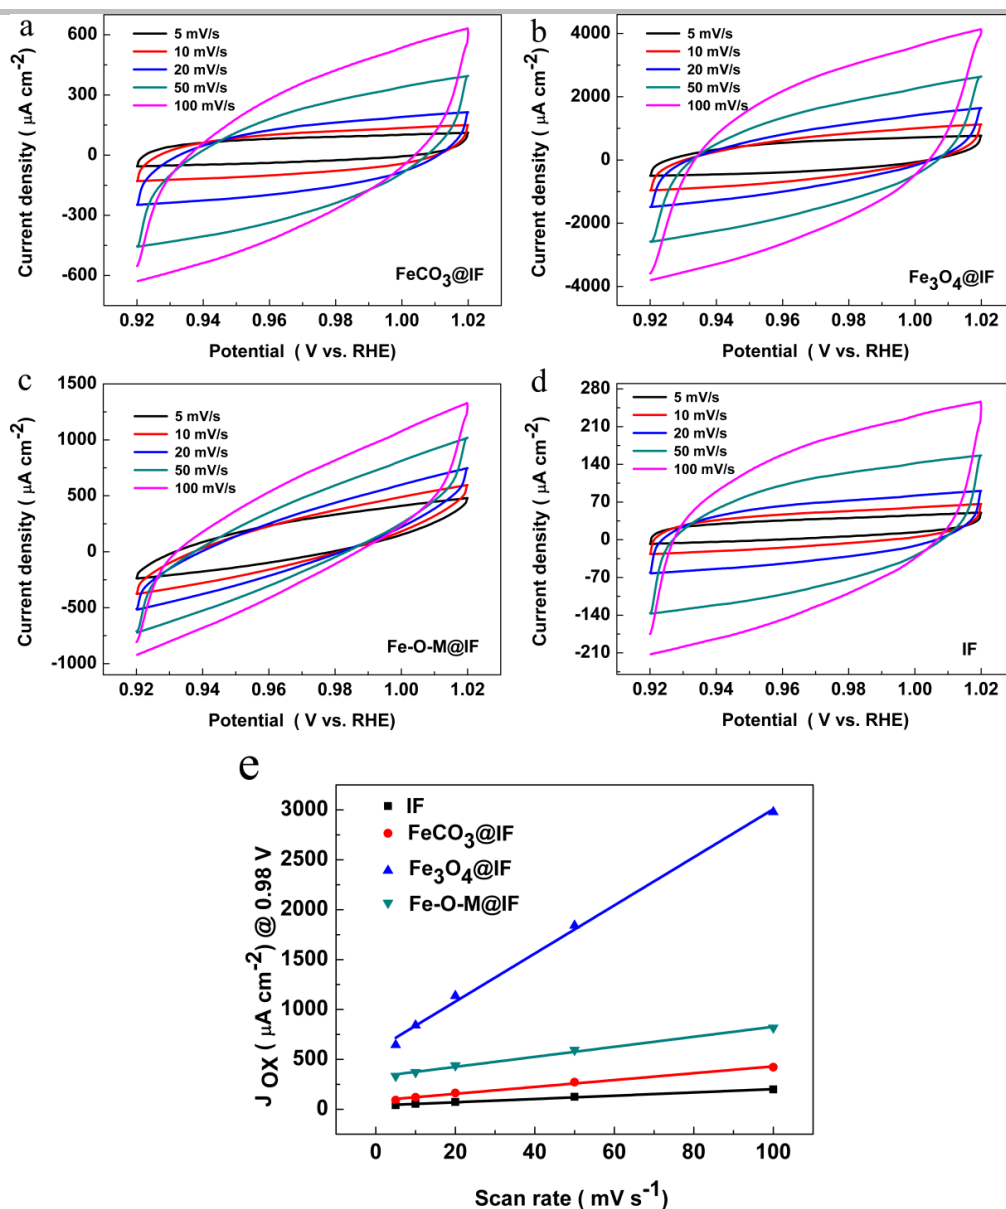

**Fig. S19** The double-layer capacitance measurements of these catalysts after HER; a-d) the cyclic voltammograms of the catalysts at a series of scan rates of 5, 10, 20, 50 and 100  $\text{mV s}^{-1}$  from 0.92 to 1.02 V vs. RHE in 1 M KOH; e) the linear fitting of the oxidation currents of the catalysts at 0.98 V vs. RHE versus scan rates.

**Table S7.** The calculated electrochemical active surface area (ECSA) of the obtained catalysts after HER.

| Catalysts                                      | IF     | FeCO <sub>3</sub> @IF | Fe <sub>3</sub> O <sub>4</sub> @IF | Fe-O-M@IF |
|------------------------------------------------|--------|-----------------------|------------------------------------|-----------|
| Specific capacitance ( $\mu\text{F cm}^{-2}$ ) | 1644.1 | 3436.8                | 24106.5                            | 5023.5    |
| ECSA ( $\text{cm}^2_{\text{ECSA}}$ )           | 41.1   | 85.9                  | 602.6                              | 125.6     |

**Table S8.** The comparison of HER catalytic activity in 1 M KOH

| Catalysts                                                      | Tafel slope<br>(mV dec <sup>-1</sup> ) | Overpotential (mV)<br>@ 10 mA cm <sup>-2</sup> | References |
|----------------------------------------------------------------|----------------------------------------|------------------------------------------------|------------|
| Fe <sub>2</sub> Ni <sub>2</sub> N                              | 101                                    | 180                                            | [27]       |
| CoS <sub>2</sub> HNSs                                          | 100                                    | 193                                            | [28]       |
| FeP NAs/CC                                                     | 146                                    | 218                                            | [29]       |
| FeP/C                                                          | 93                                     | 185                                            | [30]       |
| A-Ni@DG                                                        | 47                                     | 270                                            | [31]       |
| Fe <sub>2</sub> O <sub>3</sub>                                 | 140                                    | 423                                            | [32]       |
| N-rGO/CoFe-CoFe <sub>2</sub> O <sub>4</sub>                    | 100                                    | 190                                            | [33]       |
| Fe <sub>2</sub> O <sub>3</sub> NCs-800                         | 77                                     | 245                                            | [34]       |
| FeCoO-NF                                                       | 118                                    | 205                                            | [35]       |
| Co <sub>9</sub> S <sub>8</sub> @NOSC                           | 105                                    | 320                                            | [36]       |
| Co <sub>9</sub> S <sub>8</sub> /Ni <sub>3</sub> S <sub>2</sub> | 98                                     | 128                                            | [37]       |
| Ni <sub>3</sub> FeN                                            | 120                                    | 235                                            | [38]       |
| Ni <sub>2/3</sub> Fe <sub>1/3</sub> -rGO                       | 210                                    | 560                                            | [39]       |
| Ni@NC-800                                                      | 160                                    | 205                                            | [40]       |
| CoNiP@Ti                                                       | 115                                    | 184                                            | [41]       |
| FeCO <sub>3</sub> @IF                                          | 139                                    | 151                                            | This work  |

Table S9. The comparison of HER catalytic activity of the Pt/C (20%) in 1 M KOH

| Catalysts           | Tafel slope<br>(mV dec <sup>-1</sup> ) | Overpotential                                           | References |
|---------------------|----------------------------------------|---------------------------------------------------------|------------|
|                     |                                        | (mV)@10 mA cm <sup>-2</sup><br>/100 mA cm <sup>-2</sup> |            |
| Pt/C@Iron foam      | 48                                     | 34/113                                                  | This work  |
| Pt/C@Iron foam      | 37                                     | ~30/-                                                   | [15]       |
| Pt/C@ Ni foam       | 56                                     | ~40/~165                                                | [42]       |
| Pt/C@Ni foam        | 45                                     | ~40/~150                                                | [43]       |
| Pt/C@Ni foam        | 37                                     | ~70/~210                                                | [44]       |
| Pt/C@Ni foam        | 49                                     | 27/~100                                                 | [18]       |
| Pt/C@Ni foam        | 30                                     | 37/138                                                  | [17]       |
| Pt/C@Ni foam        | 59                                     | ~50/~170                                                | [45]       |
| Pt/C@ Carbon cloth  | 48                                     | ~30/200                                                 | [46]       |
| Pt/C@Carbon cloth   | 52                                     | 52/~290                                                 | [47]       |
| Pt/C@Carbon paper   | 44                                     | 45/~120                                                 | [48]       |
| Pt/C@ Glassy carbon | 46                                     | 60/~135                                                 | [49]       |
| Pt/C@Glassy carbon  | 37                                     | 27/109                                                  | [50]       |
| Pt/C@Co foam        | 45                                     | 40/~100                                                 | [26]       |

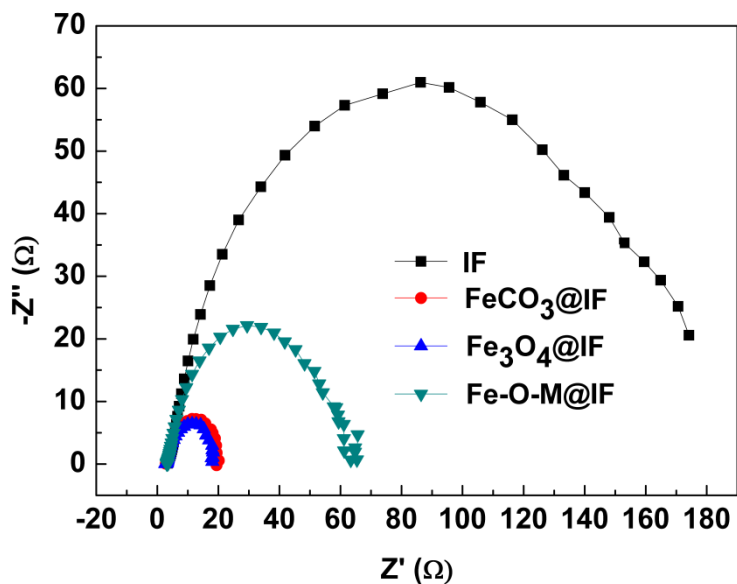

Fig. S20 The EIS of the catalytic electrodes at -0.18 V vs. RHE

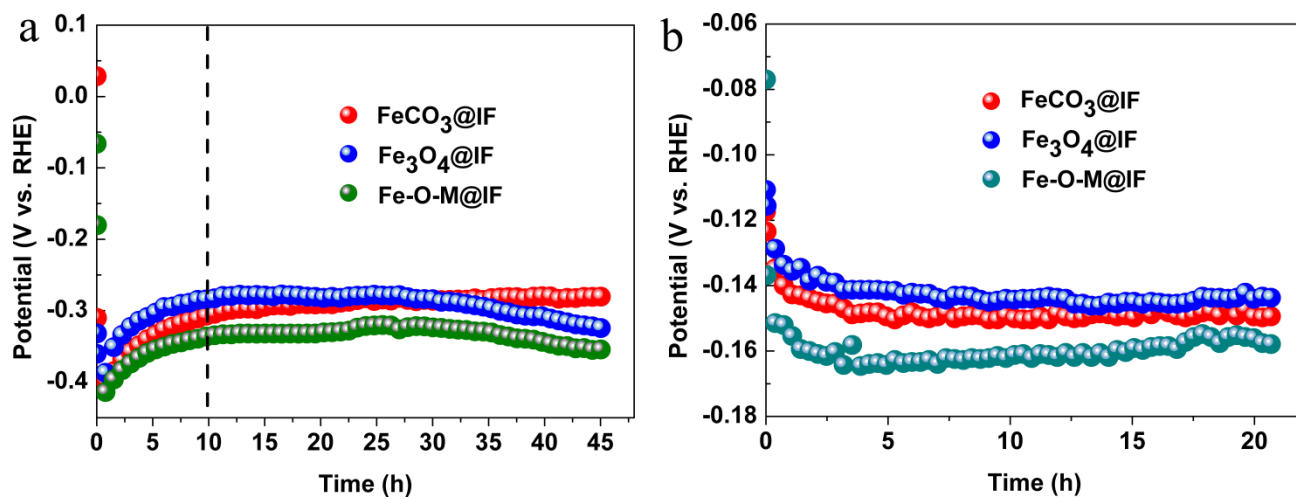

Fig. S21 The stability test of the catalysts at the current density of a)  $-100 \text{ mA cm}^{-2}$  and b)  $-10 \text{ mA cm}^{-2}$ .

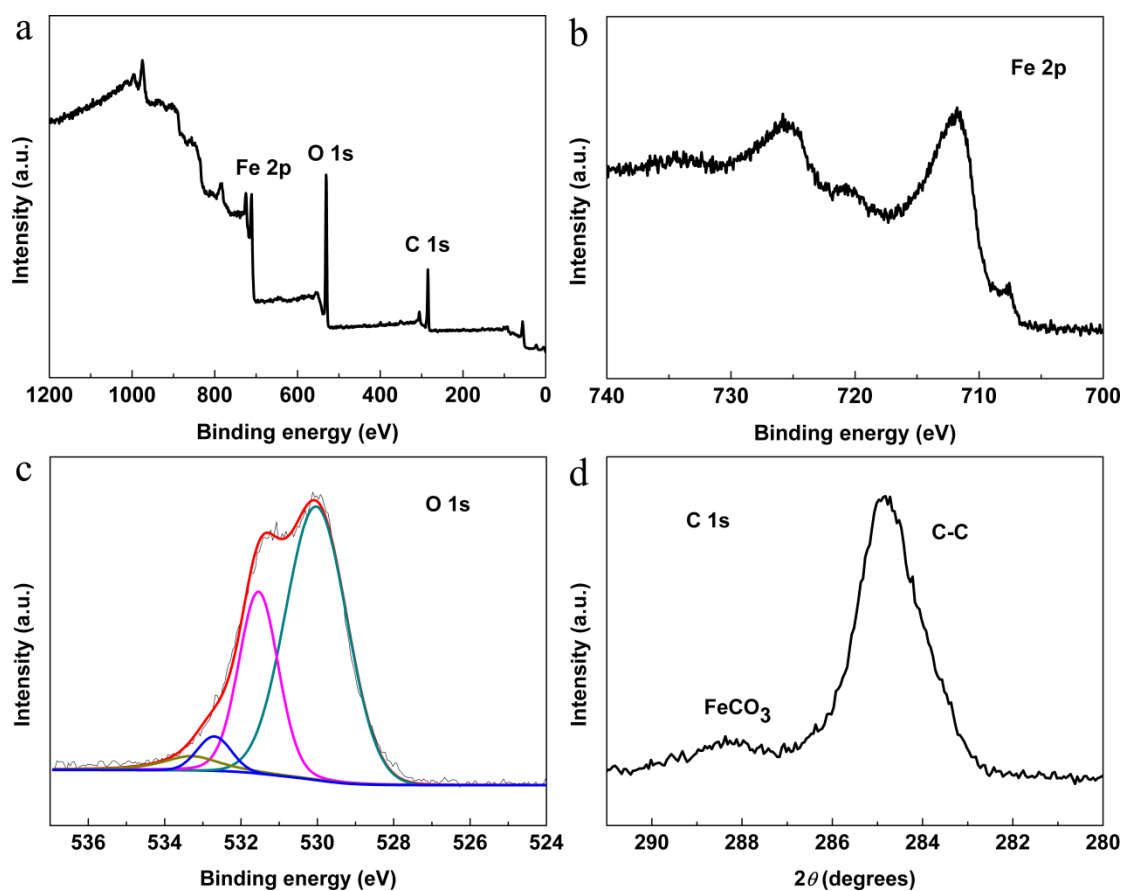

**Fig. S22** a) The full XPS spectrum, b) Fe 2p, c) O 1s and d) C 1s of FeCO<sub>3</sub>@IF after HER.

**Table S10.** According to the XPS spectra, the change of Fe content in different chemical environment for FeCO<sub>3</sub>@IF before and after HER process.

| FeCO <sub>3</sub> @IF | Fe(%)                |        |         |         |
|-----------------------|----------------------|--------|---------|---------|
|                       | Chemical environment | Fe (0) | Fe (2+) | Fe (3+) |
| Before HER            |                      | 6.81   | 33.24   | 55.95   |
| After HER             |                      | 10.05  | 12.96   | 76.99   |

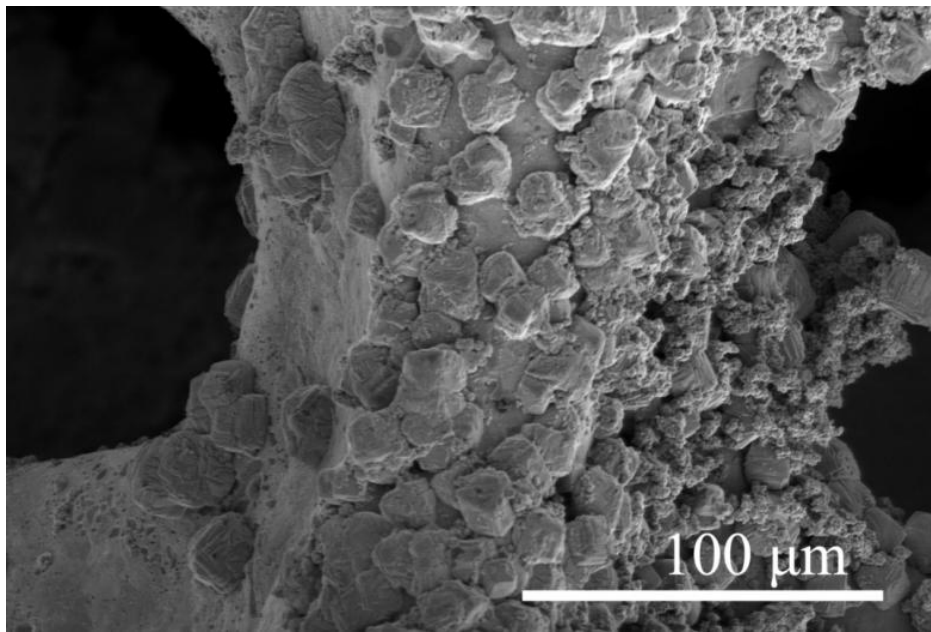

**Fig. S23** The SEM image of FeCO<sub>3</sub>@IF after HER.



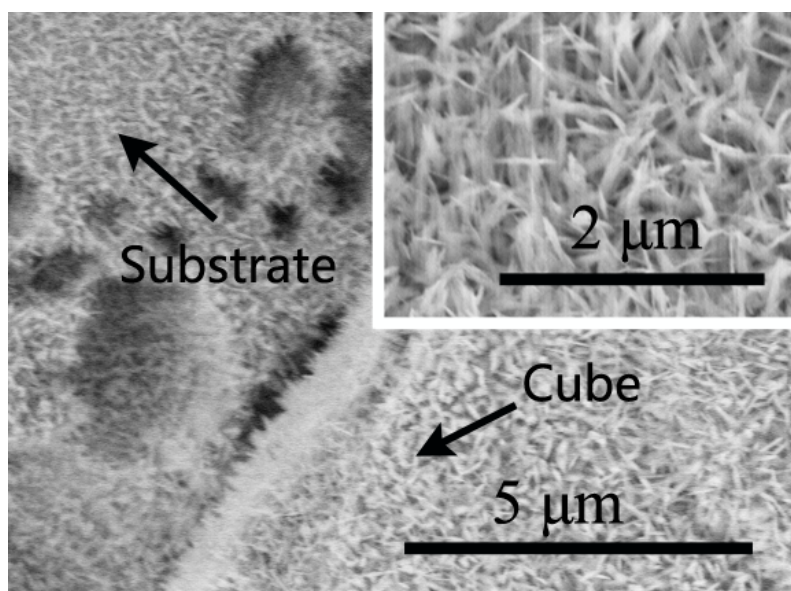

**Fig. S24** The SEM image of the surface of FeCO<sub>3</sub> cube and the area without FeCO<sub>3</sub> cubes (the inset) of FeCO<sub>3</sub>@IF after HER progress.

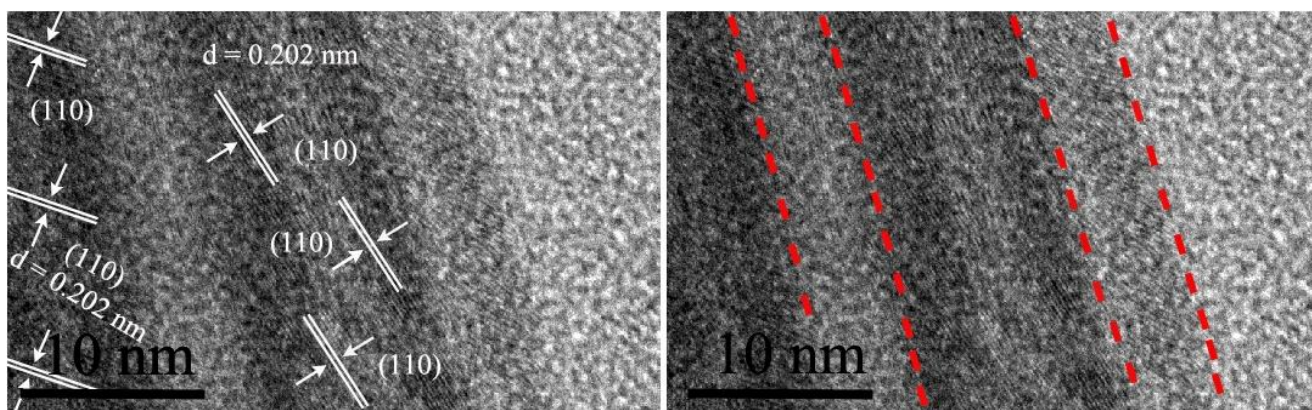

**Fig. S25** The HTEM images of FeCO<sub>3</sub>@IF after HER.

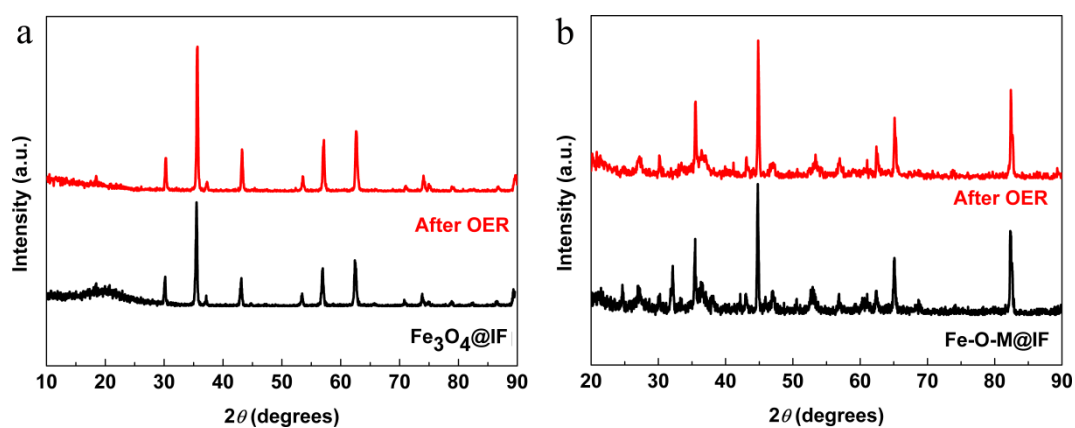

**Fig. S26** The XRD patterns of a) Fe<sub>3</sub>O<sub>4</sub>@IF and b) Fe-O-M@IF before and after OER, respectively.

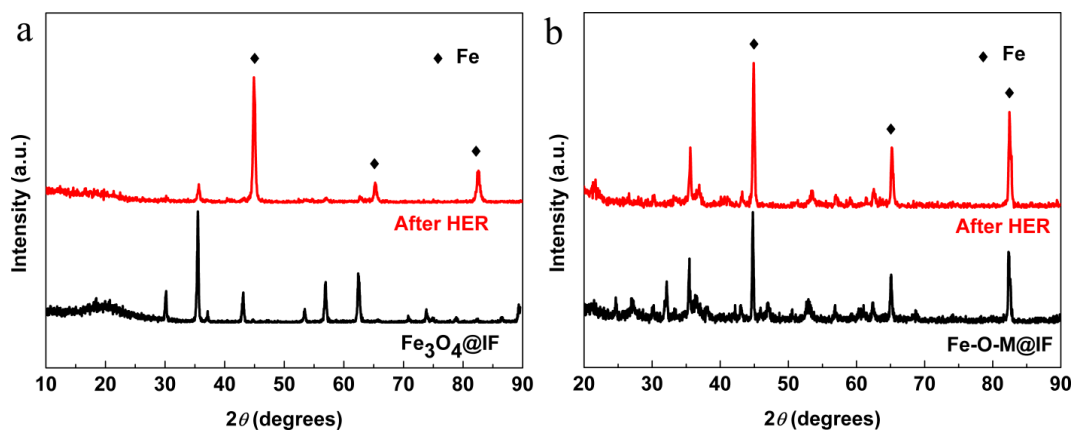

**Fig. S27** The XRD patterns of a) Fe<sub>3</sub>O<sub>4</sub>@IF and b) Fe-O-M@IF before and after HER, respectively..

The peaks related to metallic iron all become stronger in the XRD patterns of Fe<sub>3</sub>O<sub>4</sub>@IF and Fe-O-M@IF after HER, indicating the iron-based compounds are reduced to metallic iron.

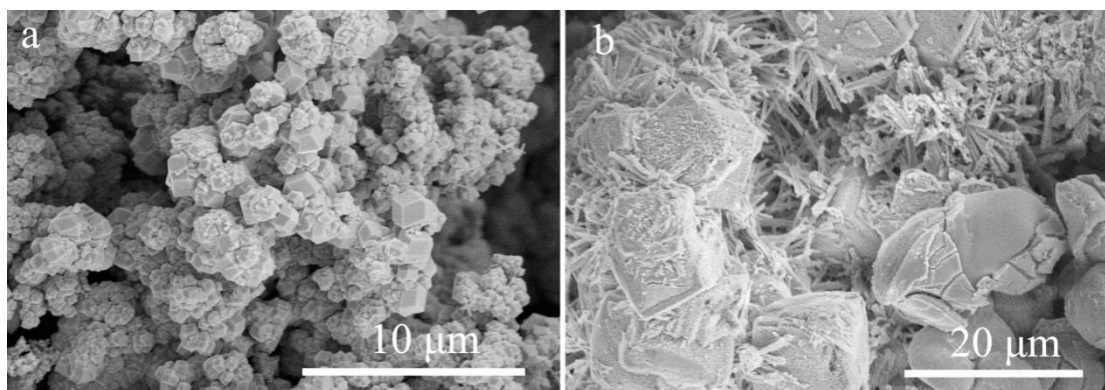

**Fig. S28** The SEM images of a)  $\text{Fe}_3\text{O}_4@IF$  and b)  $\text{Fe-O-M@IF}$  after OER, respectively.

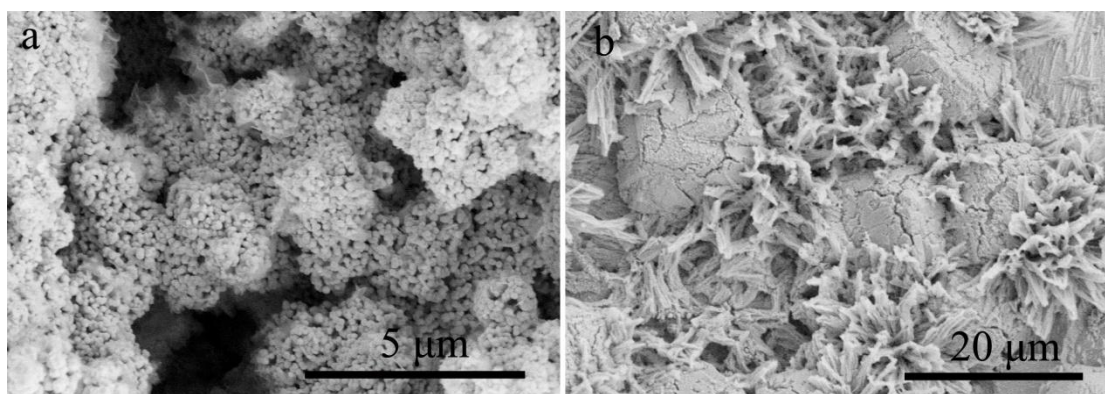

**Fig. S29** The SEM images of a)  $\text{Fe}_3\text{O}_4@IF$  and b)  $\text{Fe-O-M@IF}$  after HER, respectively.

The particles on  $\text{Fe-O-M@IF}$  after HER become looser due to the loss of abundant O in iron-based oxides

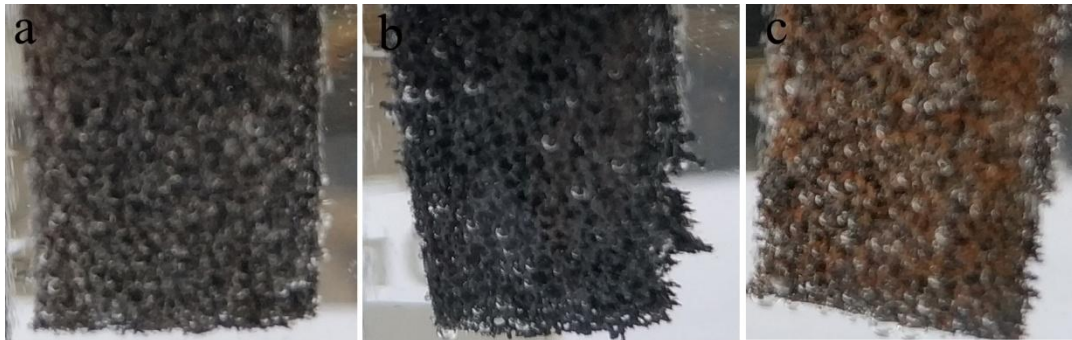

**Fig. S30** The images of bubbles on the surface a) FeCO<sub>3</sub>@IF, b) Fe<sub>3</sub>O<sub>4</sub>@IF and c) Fe-O-M@IF during HER process at the current density of 100 mA cm<sup>-2</sup>

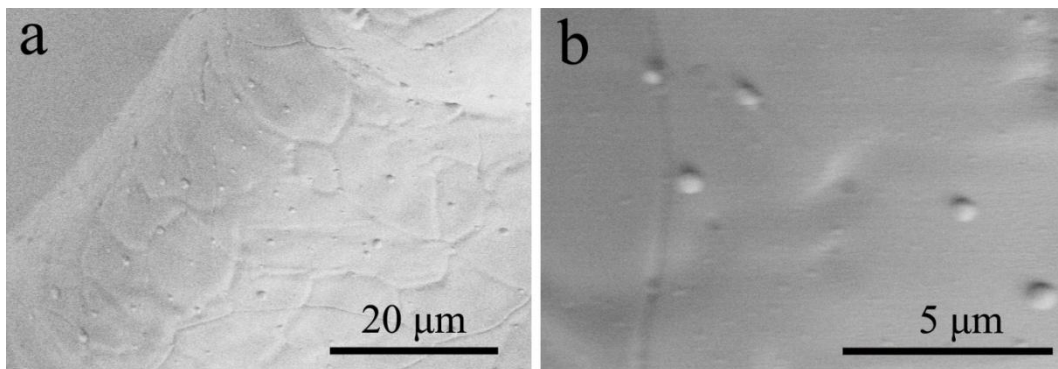

**Fig. S31** The SEM images of IF electrode after OER.



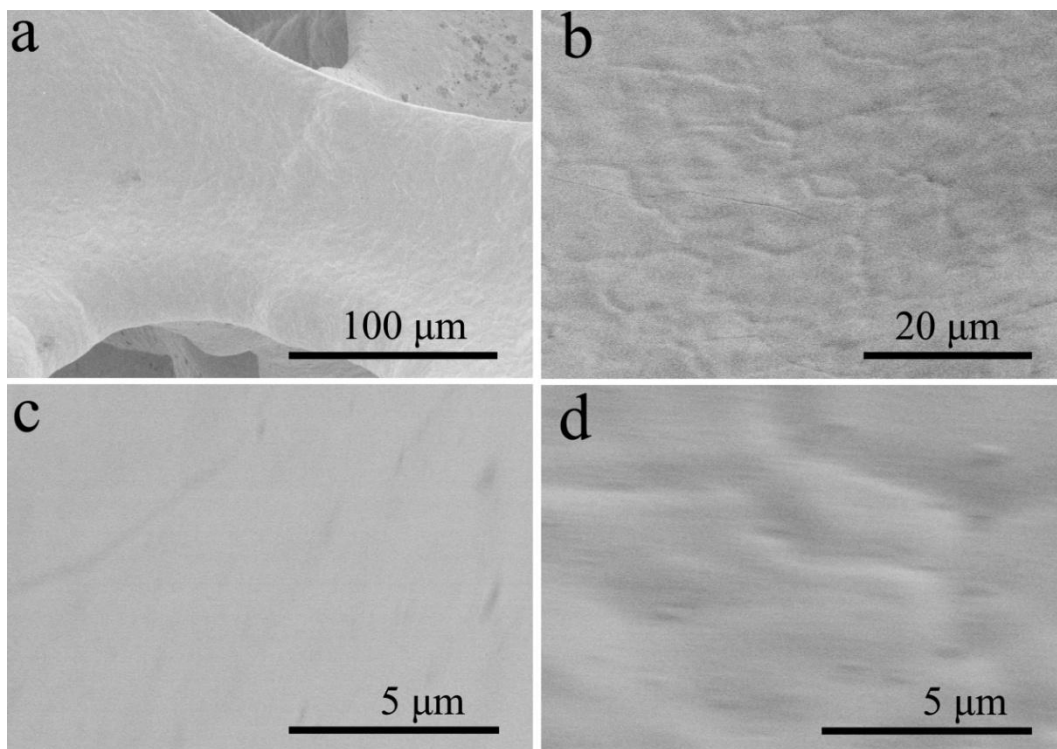

**Fig. S32** The SEM images of IF after HER process.

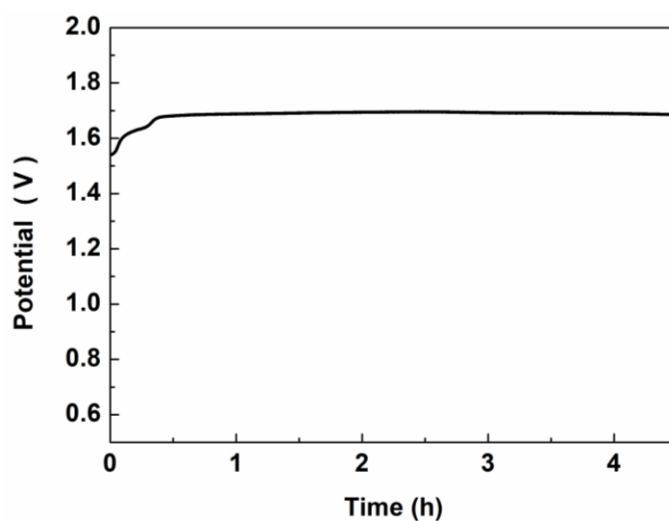

**Fig. S33** The stability test of the FeCO<sub>3</sub>@IF//FeCO<sub>3</sub>@IF at the current density of 10 mA cm<sup>-2</sup>.

**Table S11.** The comparison of overall water-splitting catalytic activity of the RuO<sub>2</sub>//Pt/C system in 1 M KOH

| Catalysts                                           | Voltage (V) @<br>50 mA cm <sup>-2</sup> /100 mA cm <sup>-2</sup> | References |
|-----------------------------------------------------|------------------------------------------------------------------|------------|
| RuO <sub>2</sub> @Iron foam//Pt/C@Iron foam         | 1.697/1.863                                                      | This work  |
| RuO <sub>2</sub> @Iron foam //Pt/C@Iron foam        | ~1.74/-                                                          | [15]       |
| RuO <sub>2</sub> @Iron foam //Pt/C@Iron foam        | ~1.98/~2.24                                                      | [16]       |
| RuO <sub>2</sub> @Ni foam //Pt/C@Ni foam            | 1.770/-                                                          | [51]       |
| RuO <sub>2</sub> @Ni foam //Pt/C@Ni foam            | ~1.680/~1.770                                                    | [19]       |
| RuO <sub>2</sub> @Ni foam //Pt/C@Ni foam            | ~1.91/-                                                          | [18]       |
| RuO <sub>2</sub> @Glassy carbon//Pt/C@Glassy carbon | ~1.800/~1.950                                                    | [49]       |
| RuO <sub>2</sub> @Carbon cloth//Pt/C@Carbon cloth   | ~1.650/-                                                         | [52]       |
| RuO <sub>2</sub> @Co foam //Pt/C@Co foam            | 1.780/~1.930                                                     | [26]       |

**Table S12.** The amount of electricity required to obtain 1 Kg H<sub>2</sub> of different electrodes in 1 M KOH

| Catalytic electrodes                         | Voltage (V)                                        | The amount of electricity (KW·h)                   |
|----------------------------------------------|----------------------------------------------------|----------------------------------------------------|
|                                              | @ 300 mA cm <sup>-2</sup> /400 mA cm <sup>-2</sup> | @ 300 mA cm <sup>-2</sup> /400 mA cm <sup>-2</sup> |
| FeCO <sub>3</sub> @IF//FeCO <sub>3</sub> @IF | 2.359/2.512                                        | 62.714/66.782                                      |
| RuO <sub>2</sub> @IF//Pt/C@IF                | 2.366/2.581                                        | 62.901/68.616                                      |

The calculation formula is as following:

1 Kg H<sub>2</sub> is generated, the required amount of charge (Q) is:

$$Q=(1000g \times N_A \times 2e)/M_{H_2} = (1000 \times 2 \times 6.022 \times 10^{23} \times 1.602 \times 10^{-19})/2.016=95706785.7 \text{ C}$$

Where N<sub>A</sub> is Avogadro constant, e is the charge of an electron and M<sub>H<sub>2</sub></sub> is the relative molecular mass of hydrogen (H<sub>2</sub>).

For the FeCO<sub>3</sub>@IF//FeCO<sub>3</sub>@IF system, the applied voltages (U1 and U2) at a current density of 300 mA cm<sup>-2</sup> and 400 mA cm<sup>-2</sup> is 2.359 V and 2.512 V, respectively. The amount of electricity (W1 and W2) required to obtain 1 Kg H<sub>2</sub> are:

$$W1 = QU1 = 95706785.7 \times 2.359 = 225772307.466 \text{ J} \approx 62.714 \text{ KW}\cdot\text{h}$$

$$W2 = QU2 = 95706785.7 \times 2.512 = 240415445.678 \text{ J} \approx 66.782 \text{ KW}\cdot\text{h}$$

For RuO<sub>2</sub>@IF//Pt/C@IF system, the applied voltages (U3 and U4) at the current density of 300 mA cm<sup>-2</sup> and 400 mA cm<sup>-2</sup> is 2.366 V and 2.581 V, respectively.

The amount of electricity (W3 and W4) required to obtain 1 Kg H<sub>2</sub> are:

$$W3 = QU3 = 95706785.7 \times 2.366 = 226442254.966 \text{ J} \approx 62.901 \text{ KW}\cdot\text{h}$$

$$W4 = QU4 = 95706785.7 \times 2.581 = 247019213.892 \text{ J} \approx 68.616 \text{ KW}\cdot\text{h}$$

Therefore, the saved energy (W1<sub>save</sub> and W2<sub>save</sub>) at the current density of 300 mA cm<sup>-2</sup> and 400 mA cm<sup>-2</sup> per kilogram H<sub>2</sub> are:

$$W1_{\text{save}} = W3 - W1 = 62.901 - 62.714 = 0.187 \text{ KW}\cdot\text{h}$$

$$W2_{\text{save}} = W4 - W2 = 68.616 - 66.782 = 1.834 \text{ KW}\cdot\text{h}$$

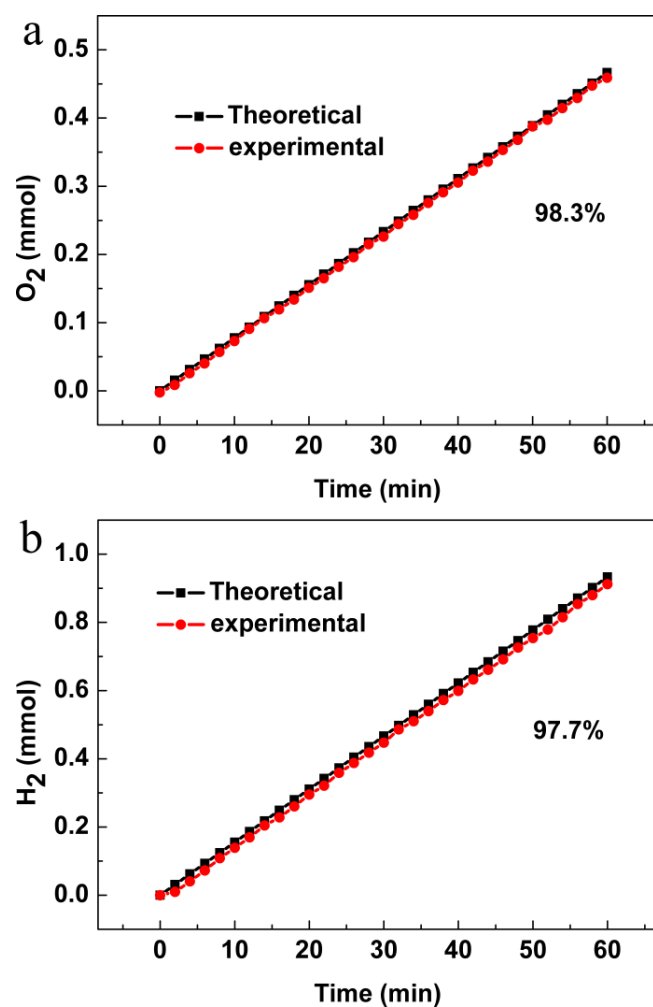

**Fig. S34** The faradaic efficiency a) OER, b) HER) of the FeCO<sub>3</sub>@IF at the current density of 50 mA cm<sup>-2</sup>



---

## References

- [1] F. Yan, C. Zhu, S. Wang, Y. Zhao, X. Zhang, C. Li, Y. Chen, Electrochemically activated-iron oxide nanosheet arrays on carbon fiber cloth as a three-dimensional self-supported electrode for efficient water oxidation, *Journal of Materials Chemistry A*, 4 (2016) 6048-6055.
- [2] J. Lee, H. Lee, B. Lim, Chemical transformation of iron alkoxide nanosheets to FeOOH nanoparticles for highly active and stable oxygen evolution electrocatalysts, *Journal of Industrial and Engineering Chemistry*, 58 (2018) 100-104.
- [3] Y. Shao, M. Zheng, M. Cai, L. He, C. Xu, Improved Electrocatalytic Performance of Core-shell NiCo/NiCoO<sub>x</sub> with amorphous FeOOH for Oxygen-evolution Reaction, *Electrochimica Acta*, 257 (2017) 1-8.
- [4] H.A. Bandal, A.R. Jadhav, A.A. Chaugule, W.J. Chung, H. Kim, Fe<sub>2</sub>O<sub>3</sub> hollow nanorods/CNT composites as an efficient electrocatalyst for oxygen evolution reaction, *Electrochimica Acta*, 222 (2016) 1316-1325.
- [5] D. Xiong, X. Wang, W. Li, L. Liu, Facile synthesis of iron phosphide nanorods for efficient and durable electrochemical oxygen evolution, *Chemical Communications*, 52 (2016) 8711-8714.
- [6] T. Gao, C. Zhou, Y. Zhang, Z. Jin, H. Yuan, D. Xiao, Ultra-fast pyrolysis of ferrocene to form Fe/C heterostructures as robust oxygen evolution electrocatalysts, *Journal of Materials Chemistry A*, 6 (2018) 21577-21584.
- [7] P. Chen, K. Xu, Z. Fang, Y. Tong, J. Wu, X. Lu, X. Peng, H. Ding, C. Wu, Y. Xie, Metallic Co<sub>4</sub>N Porous Nanowire Arrays Activated by Surface Oxidation as Electrocatalysts for the Oxygen Evolution Reaction, *Angewandte Chemie International Edition*, 54 (2015) 14710-14714.
- [8] Y. Tan, H. Wang, P. Liu, Y. Shen, C. Cheng, A. Hirata, T. Fujita, Z. Tang, M. Chen, Versatile nanoporous bimetallic phosphides towards electrochemical water splitting, *Energy & Environmental Science*, 9 (2016) 2257-2261.
- [9] H. Liang, F. Meng, M. Cabán-Acevedo, L. Li, A. Forticaux, L. Xiu, Z. Wang, S. Jin, Hydrothermal Continuous Flow Synthesis and Exfoliation of NiCo Layered Double Hydroxide Nanosheets for Enhanced Oxygen Evolution Catalysis, *Nano Letters*, 15 (2015) 1421-1427.
- [10] K. Yan, T. Lafleur, J. Chai, C. Jarvis, Facile synthesis of thin NiFe-layered double hydroxides nanosheets efficient for oxygen evolution, *Electrochemistry Communications*, 62 (2016) 24-28.
- [11] J.A. Haber, Y. Cai, S. Jung, C. Xiang, S. Mitrovic, J. Jin, A.T. Bell, J.M. Gregoire, Discovering Ce-rich oxygen evolution catalysts, from high throughput screening to water electrolysis, *Energy & Environmental Science*, 7 (2014) 682-688.
- [12] T. Gao, Z. Jin, Y. Zhang, G. Tan, H. Yuan, D. Xiao, Coupling cobalt-iron bimetallic nitrides and N-doped multi-walled carbon nanotubes as high-performance bifunctional catalysts for oxygen evolution and reduction reaction, *Electrochimica Acta*, 258 (2017) 51-60.
- [13] M. Shalom, D. Ressnig, X. Yang, G. Clavel, T.P. Fellingner, M. Antonietti, Nickel nitride as an efficient electrocatalyst for water splitting, *Journal of Materials Chemistry A*, 3 (2015) 8171-8177.
- [14] H. Liang, A.N. Gandi, D.H. Anjum, X. Wang, U. Schwingenschlöggl, H.N. Alshareef, Plasma-Assisted Synthesis of NiCoP for Efficient Overall Water Splitting, *Nano Letters*, 16 (2016) 7718-7725.
- [15] G. Li, J. Yu, W. Yu, L. Yang, X. Zhang, X. Liu, H. Liu, W. Zhou, Phosphorus-Doped Iron Nitride Nanoparticles Encapsulated by Nitrogen-Doped Carbon Nanosheets on Iron Foam In Situ Derived from *Saccharomyces Cerevisiae* for Electrocatalytic Overall Water Splitting, *Small*, (2020) 2001980.
- [16] Y. Wang, B. Ma, Y. Chen, Iron phosphides supported on three-dimensional iron foam as an efficient electrocatalyst for water splitting reactions, *Journal of Materials Science*, 54 (2019) 14872-14883.
- [17] Z. Zou, X. Wang, J. Huang, Z. Wu, F. Gao, An Fe-doped nickel selenide nanorod/nanosheet hierarchical array for efficient overall water splitting, *Journal of Materials Chemistry A*, 7 (2019) 2233-2241.
- [18] Y. Li, F. Li, Y. Zhao, S. Li, J. Zeng, H. Yao, Y. Chen, Iron doped cobalt phosphide ultrathin nanosheets on nickel foam for overall water splitting, *Journal of Materials Chemistry A*, 7 (2019) 20658-20666.
- [19] M. Qu, Y. Jiang, M. Yang, S. Liu, Q. Guo, W. Shen, M. Li, R. He, Regulating electron density of NiFe-P nanosheets electrocatalysts by a trifle of Ru for high-efficient overall water splitting, *Applied Catalysis B: Environmental*, 263 (2020) 118324.
- [20] J. Guo, K. Zhang, Y. Sun, Q. Liu, L. Tang, X. Zhang, Efficient bifunctional vanadium-doped Ni<sub>3</sub>S<sub>2</sub> nanorod array for overall water splitting, *Inorganic Chemistry Frontiers*, 6 (2019) 443-450.
- [21] J. Lin, P. Wang, H. Wang, C. Li, X. Si, J. Qi, J. Cao, Z. Zhong, W. Fei, J. Feng, Defect-Rich Heterogeneous MoS<sub>2</sub>/NiS<sub>2</sub> Nanosheets Electrocatalysts for Efficient Overall Water Splitting, 6 (2019) 1900246.
- [22] S. Dutta, A. Indra, Y. Feng, H. Han, T. Song, Promoting electrocatalytic overall water splitting with nanohybrid of transition metal nitride-oxynitride, *Applied Catalysis B: Environmental*, 241 (2019) 521-527.
- [23] J. Lin, Y. Yan, C. Li, X. Si, H. Wang, J. Qi, J. Cao, Z. Zhong, W. Fei, J. Feng, Bifunctional Electrocatalysts Based on Mo-Doped NiCoP Nanosheet Arrays for Overall Water Splitting, *Nano-Micro Letters*, 11 (2019) 55.
- [24] G. Zhou, M. Li, Y. Li, H. Dong, D. Sun, X. Liu, L. Xu, Z. Tian, Y. Tang, Regulating the Electronic Structure of CoP Nanosheets by O Incorporation for High-Efficiency Electrochemical Overall Water Splitting, 30 (2020) 1905252.
- [25] L. Ji, J. Wang, X. Teng, T. Meyer, Z. Chen, CoP Nanoframes as Bifunctional Electrocatalysts for Efficient Overall Water Splitting, *ACS Catalysis*, 10 (2020) 412-419.
- [26] Z. Liu, X. Yu, H. Xue, L. Feng, A nitrogen-doped CoP nanoarray over 3D porous Co foam as an efficient bifunctional electrocatalyst for overall water splitting, *Journal of Materials Chemistry A*, 7 (2019) 13242-13248.

- [27] M. Jiang, Y. Li, Z. Lu, X. Sun, X. Duan, Binary nickel-iron nitride nanoarrays as bifunctional electrocatalysts for overall water splitting, *Inorganic Chemistry Frontiers*, 3 (2016) 630-634.
- [28] X. Ma, W. Zhang, Y. Deng, C. Zhong, W. Hu, X. Han, Phase and composition controlled synthesis of cobalt sulfide hollow nanospheres for electrocatalytic water splitting, *Nanoscale*, 10 (2018) 4816-4824.
- [29] Y. Liang, Q. Liu, A.M. Asiri, X. Sun, Y. Luo, Self-Supported FeP Nanorod Arrays: A Cost-Effective 3D Hydrogen Evolution Cathode with High Catalytic Activity, *ACS Catalysis*, 4 (2014) 4065-4069.
- [30] F. Wang, X. Yang, B. Dong, X. Yu, H. Xue, L. Feng, A FeP powder electrocatalyst for the hydrogen evolution reaction, *Electrochemistry Communications*, 92 (2018) 33-38.
- [31] L. Zhang, Y. Jia, G. Gao, X. Yan, N. Chen, J. Chen, M.T. Soo, B. Wood, D. Yang, A. Du, X. Yao, Graphene Defects Trap Atomic Ni Species for Hydrogen and Oxygen Evolution Reactions, *Chem*, 4 (2018) 285-297.
- [32] R.N. Ali, H. Naz, X. Zhu, J. Xiang, G. Hu, B. Xiang, Synthesis, characterization and applications of pH controlled Fe<sub>2</sub>O<sub>3</sub> nanoparticles for electrocatalytic hydrogen evolution reaction, *Materials Research Express*, 6 (2018) 025516.
- [33] Z. Wu, P. Li, Q. Qin, Z. Li, X. Liu, N-doped graphene combined with alloys (NiCo, CoFe) and their oxides as multifunctional electrocatalysts for oxygen and hydrogen electrode reactions, *Carbon*, 139 (2018) 35-44.
- [34] J. Jiang, L. Zhu, Y. Sun, Y. Chen, H. Chen, S. Han, H. Lin, Fe<sub>2</sub>O<sub>3</sub> nanocatalysts on N-doped carbon nanomaterial for highly efficient electrochemical hydrogen evolution in alkaline, *Journal of Power Sources*, 426 (2019) 74-83.
- [35] H.A. Bandal, A.R. Jadhav, A.H. Tamboli, H. Kim, Bimetallic iron cobalt oxide self-supported on Ni-Foam: An efficient bifunctional electrocatalyst for oxygen and hydrogen evolution reaction, *Electrochimica Acta*, 249 (2017) 253-262.
- [36] S. Huang, Y. Meng, S. He, A. Goswami, Q. Wu, J. Li, S. Tong, T. Asefa, M. Wu, N-, O-, and S-Tridoped Carbon-Encapsulated Co<sub>9</sub>S<sub>8</sub> Nanomaterials: Efficient Bifunctional Electrocatalysts for Overall Water Splitting, *Advanced Functional Materials*, 27 (2017) 1606585.
- [37] F. Du, L. Shi, Y. Zhang, T. Li, J. Wang, G. Wen, A. Alsaedi, T. Hayat, Y. Zhou, Z. Zou, Foam-like Co<sub>9</sub>S<sub>8</sub>/Ni<sub>3</sub>S<sub>2</sub> heterostructure nanowire arrays for efficient bifunctional overall water-splitting, *Applied Catalysis B: Environmental*, 253 (2019) 246-252.
- [38] Y. Gu, S. Chen, J. Ren, Y.A. Jia, C. Chen, S. Komarneni, D. Yang, X. Yao, Electronic Structure Tuning in Ni<sub>3</sub>FeN/r-GO Aerogel toward Bifunctional Electrocatalyst for Overall Water Splitting, *ACS Nano*, 12 (2018) 245-253.
- [39] W. Ma, R. Ma, C. Wang, J. Liang, X. Liu, K. Zhou, T. Sasaki, A Superlattice of Alternately Stacked Ni-Fe Hydroxide Nanosheets and Graphene for Efficient Splitting of Water, *ACS Nano*, 9 (2015) 1977-1984.
- [40] Y. Xu, W. Tu, B. Zhang, S. Yin, Y. Huang, M. Kraft, R. Xu, Nickel Nanoparticles Encapsulated in Few-Layer Nitrogen-Doped Graphene Derived from Metal-Organic Frameworks as Efficient Bifunctional Electrocatalysts for Overall Water Splitting, *Advanced Materials*, 29 (2017) 1605957.
- [41] A. Han, H. Chen, H. Zhang, Z. Sun, P. Du, Ternary metal phosphide nanosheets as a highly efficient electrocatalyst for water reduction to hydrogen over a wide pH range from 0 to 14, *Journal of Materials Chemistry A*, 4 (2016) 10195-10202.
- [42] Y. Yang, K. Zhang, H. Lin, X. Li, H.C. Chan, L. Yang, Q. Gao, MoS<sub>2</sub>-Ni<sub>3</sub>S<sub>2</sub> Heteronanorods as Efficient and Stable Bifunctional Electrocatalysts for Overall Water Splitting, *ACS Catalysis*, 7 (2017) 2357-2366.
- [43] P. Wang, Z. Pu, W. Li, J. Zhu, C. Zhang, Y. Zhao, S. Mu, Coupling NiSe<sub>2</sub>-Ni<sub>2</sub>P heterostructure nanowrinkles for highly efficient overall water splitting, *Journal of Catalysis*, 377 (2019) 600-608.
- [44] W. Ye, Y. Yang, X. Fang, M. Arif, X. Chen, D. Yan, 2D Cocrystallized Metal-Organic Nanosheet Array as an Efficient and Stable Bifunctional Electrocatalyst for Overall Water Splitting, *ACS Sustainable Chemistry & Engineering*, 7 (2019) 18085-18092.
- [45] Y. Xiong, L. Xu, C. Jin, Q. Sun, Interface-engineered atomically thin Ni<sub>3</sub>S<sub>2</sub>/MnO<sub>2</sub> heterogeneous nanoarrays for efficient overall water splitting in alkaline media, *Applied Catalysis B: Environmental*, 254 (2019) 329-338.
- [46] C. Guan, W. Xiao, H. Wu, X. Liu, W. Zang, H. Zhang, J. Ding, Y.P. Feng, S.J. Pennycook, J. Wang, Hollow Mo-doped CoP nanoarrays for efficient overall water splitting, *Nano Energy*, 48 (2018) 73-80.
- [47] Z. Chen, Y. Ha, H. Jia, X. Yan, M. Chen, M. Liu, R. Wu, Oriented Transformation of Co-LDH into 2D/3D ZIF-67 to Achieve Co-N-C Hybrids for Efficient Overall Water Splitting, 9 (2019) 1803918.
- [48] L. Dai, Z. Chen, L. Li, P. Yin, Z. Liu, H. Zhang, Ultrathin Ni(0)-Embedded Ni(OH)<sub>2</sub> Heterostructured Nanosheets with Enhanced Electrochemical Overall Water Splitting, 32 (2020) 1906915.
- [49] Z. Liu, M. Zha, Q. Wang, G. Hu, L. Feng, Overall water-splitting reaction efficiently catalyzed by a novel bi-functional Ru/Ni<sub>3</sub>N-Ni electrode, *Chemical Communications*, 56 (2020) 2352-2355.
- [50] C. Zhang, H. Liu, J. He, G. Hu, H. Bao, F. Lü, L. Zhuo, J. Ren, X. Liu, J. Luo, Boosting hydrogen evolution activity of vanadyl pyrophosphate nanosheets for electrocatalytic overall water splitting, *Chemical Communications*, 55 (2019) 10511-10514.
- [51] H. Yan, Y. Xie, A. Wu, Z. Cai, L. Wang, C. Tian, X. Zhang, H. Fu, Anion-Modulated HER and OER Activities of 3D Ni-V-Based Interstitial Compound Heterojunctions for High-Efficiency and Stable Overall Water Splitting, 31 (2019) 1901174.
- [52] J. Lin, P. Wang, H. Wang, C. Li, X. Si, J. Qi, J. Cao, Z. Zhong, W. Fei, J. Feng, Defect-Rich Heterogeneous MoS<sub>2</sub>/NiS<sub>2</sub> Nanosheets Electrocatalysts for Efficient Overall Water Splitting, *Advanced Science*, 6 (2019) 1900246.
